# Supplementary material for: Construction of novel polyethylenimine-g-C3N4/BiOCl heterojunctions for the efficient photocatalytic degradation of nitro explosives
Source: Royal Society of Chemistry journal article supplement (doi:10.1039/d1nj03050g), 2021-01-01
Supplement: d1nj03050g1.pdf [file d1nj03050g1.pdf]

Supporting information for

## Construction of novel polyethylenimine-g-C<sub>3</sub>N<sub>4</sub>/BiOCl heterojunctions for the efficient photocatalytic degradation of nitro explosives

Jing Yan<sup>a</sup>, Xiaomin Song<sup>a</sup>, Bo Jin<sup>a\*</sup>, and Rufang Peng<sup>a</sup>

<sup>a</sup>State Key Laboratory of Environment-friendly Energy Materials, School of Materials Science and Engineering,

Southwest University of Science and Technology, Mianyang, 621010, China

\*E-mail: jinbo0428@163.com

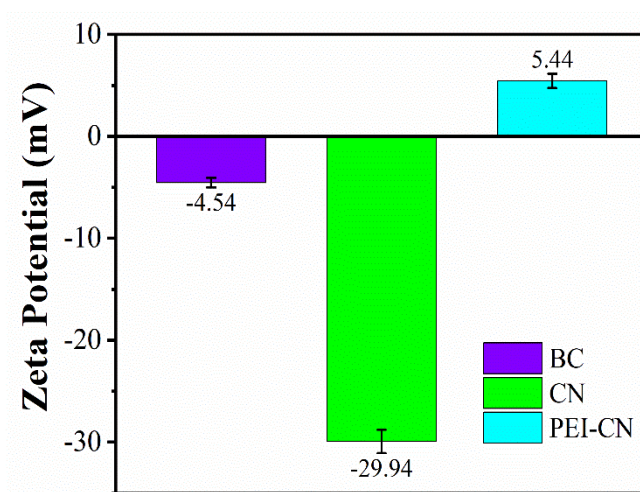

Fig. S1 Zeta potential of BC, CN and PEI-CN.

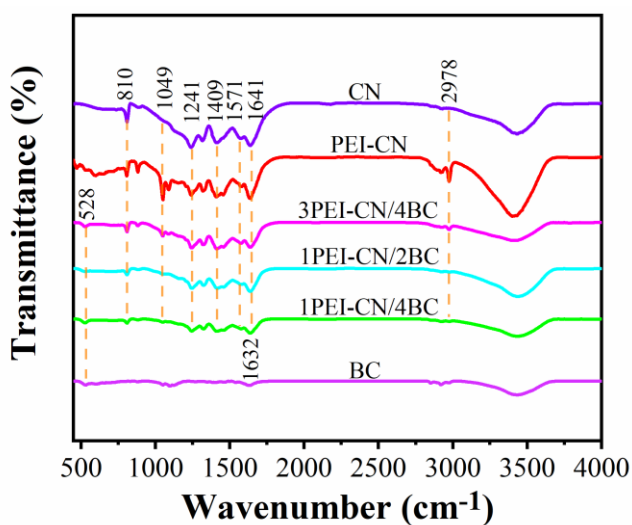

Fig. S2 FT-IR spectra of the prepared samples.

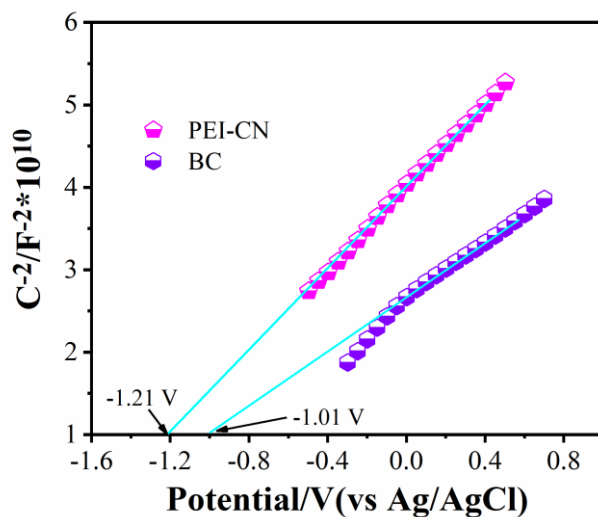

Fig. S3 Mott-Schottky curves of PEI-CN and BC.

Table. S1  $k$ ,  $S_{\text{BET}}$ , and  $k_s$  of the prepared PEI-CN, BC and 1PEI-CN/2BC.

| Sample      | $k$               | $S_{\text{BET}}$           | $k_s^a$                           |
|-------------|-------------------|----------------------------|-----------------------------------|
|             | $\text{min}^{-1}$ | $\text{m}^2 \text{g}^{-1}$ | $\text{g min}^{-1} \text{m}^{-2}$ |
| PEI-CN      | 0.00215           | 13.997                     | 0.000384                          |
| BC          | 0.01172           | 6.3982                     | 0.004579                          |
| 1PEI-CN/2BC | 0.04715           | 10.182                     | 0.011577                          |

<sup>a</sup>  $k_s = k * (\text{catalyst concentration} * S_{\text{BET}})^{-1}$ .

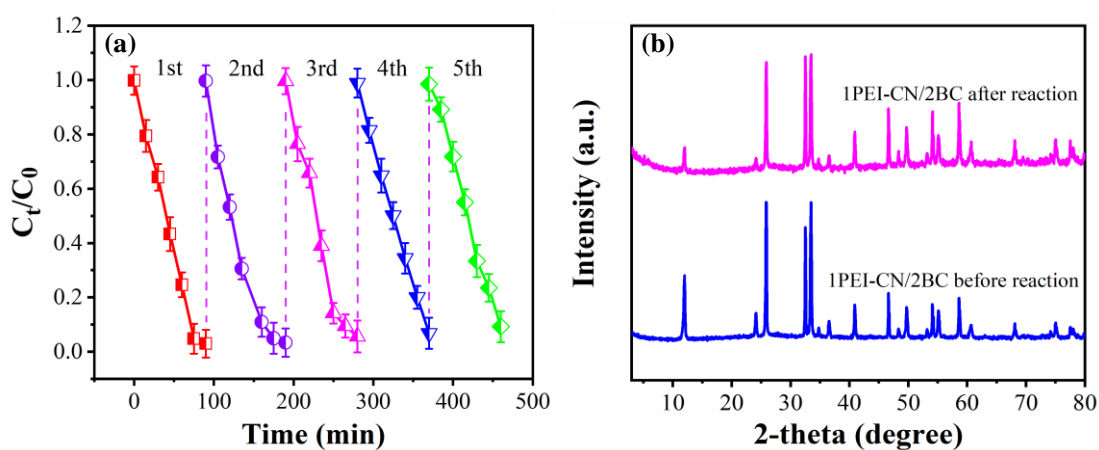

Fig. S4 (a) Five consecutive cycles of PNP degradation using 1PEI-CN/2BC and (b) XRD patterns of 1PEI-CN/2BC before and after reaction.

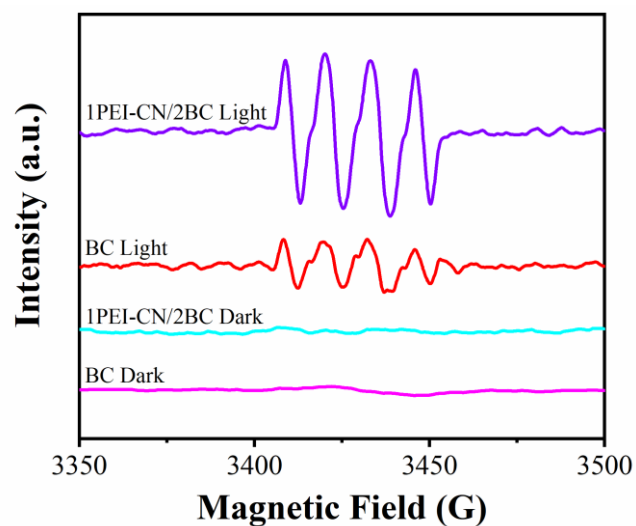

**Fig. S5** EPR spectra of radical adduct trapped by DMPO in 1PEI-CN/2BC: methanol dispersion (for DMPO- $\bullet$ O<sub>2</sub><sup>-</sup>).

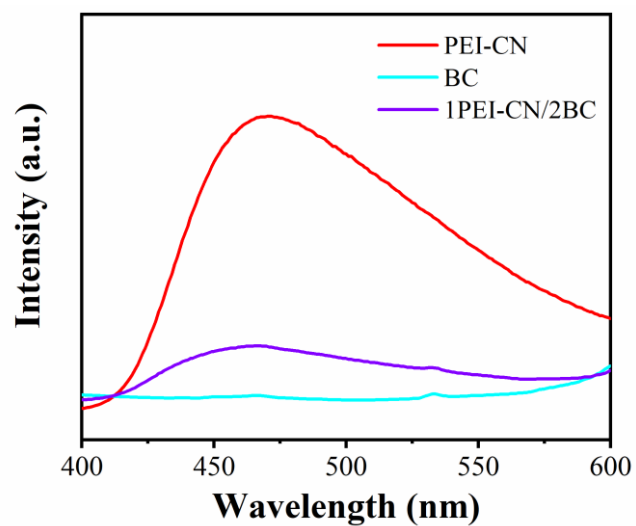

**Fig. S6** PL spectra of PEI-CN, BC and 1PEI-CN/2BC ( $\lambda_{exc}=315$  nm).
